# Supplementary material for: 3D-Printed Alginate/Pectin-Based Patches Loaded with Olive Leaf Extracts for Wound Healing Applications: Development, Characterization and In Vitro Evaluation of Biological Properties
Source: MDPI journal article supplement (doi:10.3390/pharmaceutics16010099), 2024-01-11
Supplement: s1 [file s1]

**Table S1.** CaCl<sub>2</sub> concentration and time of crosslinking reaction.

| <b>SAMPLE</b> | <b>CaCl<sub>2</sub><br/>(mM)</b> | <b>Crosslinking time<br/>(sec)</b> |
|---------------|----------------------------------|------------------------------------|
| OLEF_1        | 90.11                            | 20                                 |
| OLEF_2        | 90.11                            | 40                                 |
| OLEF_3        | 90.11                            | 60                                 |
| OLEF_4        | 135.16                           | 20                                 |
| OLEF_5        | 135.16                           | 40                                 |
| OLEF_6        | 135.16                           | 60                                 |
| OLEF_7        | 180.21                           | 20                                 |
| OLEF_8        | 180.21                           | 40                                 |
| OLEF_9        | 180.21                           | 60                                 |
